# Supplementary material
Source: PubMed Central journal article supplement (PMC10655953)
Supplement: NIHMS1862247-supplement-1.pdf [file NIHMS1862247-supplement-1.pdf]

## Supplementary Material

Considering the negative correlation between solving problems via insight and sharing fake and real news, we performed a linear regression analysis to investigate if solving problems via insight could predict sharing content on the media. Problem solving via insight was a significant negative predictor of sharing both fake news content ( $F(1,59) = 4.7; \beta = -.27; p = .032, 95\% \text{ CI } -10.8 \text{ to } -.49$ ) as well as a significant negative predictor of sharing real content ( $F(1,59) = 5.2; \beta = -.28; p = .025, 95\% \text{ CI } -12.23 \text{ to } -.83$ ). These results indicate that insight problem solving predicts not just detecting fake news but also whether a person will share the content online.

We did not find any relation between problems solved incorrectly, incorrectly via insight, and incorrectly via step-by-step and sharing fake news.
